# Supplementary material for: Objective evaluation of choroidal melanin loss in patients with Vogt–Koyanagi–Harada disease using polarization-sensitive optical coherence tomography
Source: PubMed Central journal article supplement (PMC8894486; doi:10.1038/s41598-022-07591-9), 2022-03-03
Supplement: 41598_2022_7591_MOESM1_ESM.pdf [file 41598_2022_7591_MOESM1_ESM.pdf]

## **Objective evaluation of choroidal melanin loss in patients with Vogt–Koyanagi–Harada disease using polarization-sensitive optical coherence tomography**

Masahiro Miura,<sup>1\*</sup> Shuichi Makita,<sup>2</sup> Yoshiaki Yasuno,<sup>2</sup> Shinnosuke Azuma,<sup>3</sup> Toshihiro Mino<sup>3</sup>, Tatsuo Yamaguchi<sup>3</sup>, Takuya Iwasaki,<sup>1</sup> Rei Nemoto,<sup>1</sup> Hiroyuki Shimizu,<sup>1</sup> Hiroshi Goto<sup>4</sup>

<sup>1</sup> Department of Ophthalmology, Tokyo Medical University, Ibaraki Medical Center, Ami, Japan

<sup>2</sup> Computational Optics Group, University of Tsukuba, Tsukuba, Japan

<sup>3</sup> Topcon Corporation, Tokyo, Japan

<sup>4</sup> Department of Ophthalmology, Tokyo Medical University, Tokyo, Japan

\* Corresponding author:

Masahiro Miura

Department of Ophthalmology, Tokyo Medical University, Ibaraki Medical Center  
3-20-1 Chuo, Ami, Inashiki, Ibaraki 300395, Japan

Tel: +81-298-87-1161 Fax: +81-298-87-7656 E-mail: [m-miura@tokyo-med.ac.jp](mailto:m-miura@tokyo-med.ac.jp)

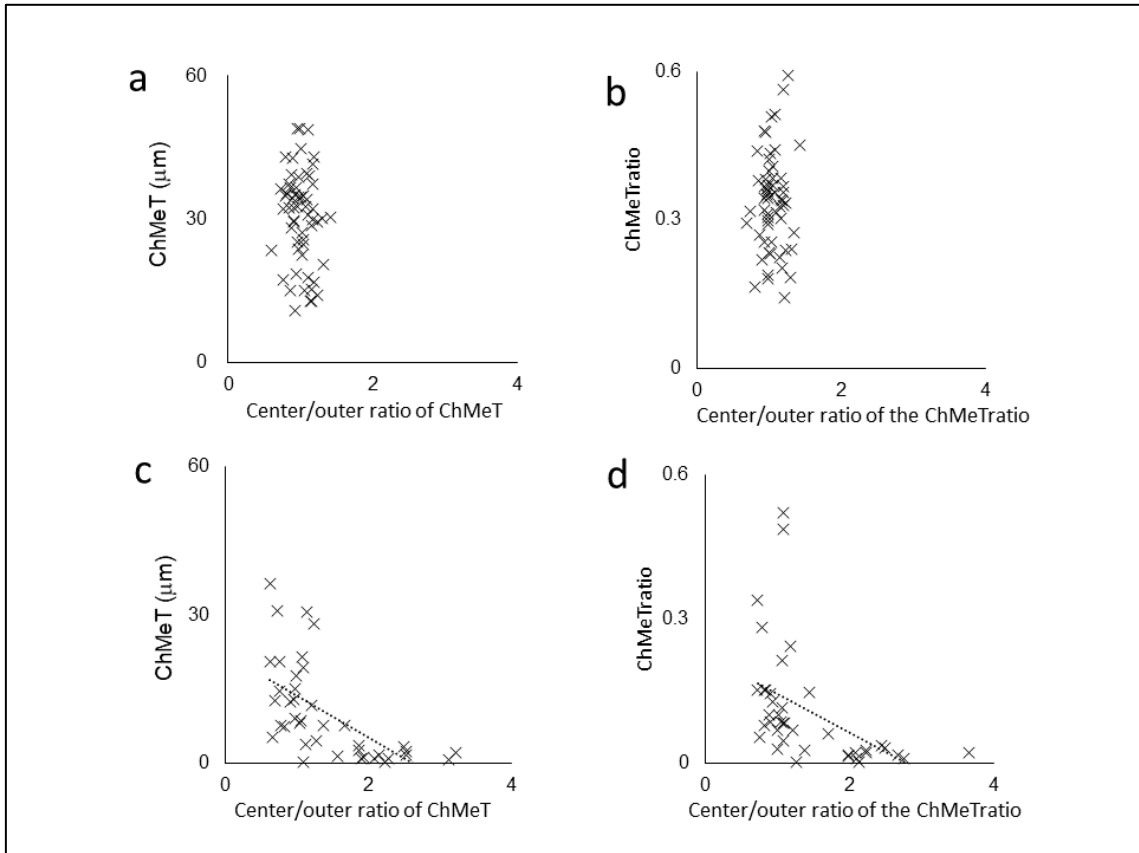

**Supplementary Figure S1.** Scatterplots illustrating the relationships between choroidal melanin thickness (ChMeT) and the center/outer ratio of ChMeT and between the choroidal melanin thickness ratio (ChMeTratio) and the center/outer ratio of the ChMeTratio. (a) Relationship between ChMeT and the center/outer ratio of ChMeT for the eyes of healthy controls. (b) Relationship between the ChMeTratio and the center/outer ratio of the ChMeTratio for the eyes of healthy controls. (c) Relationship between ChMeT and the center/outer ratio of ChMeT for the eyes of patients with Vogt-Koyanagi-Harada disease. The regression line is shown in black dashes for the correlation between ChMeT and the center/outer ratio of ChMeT. (d) Relationship between the ChMeTratio and the center/outer ratio of the ChMeTratio for the eyes of patients with Vogt-Koyanagi-Harada disease. The regression line is shown in black dashes for the correlation between the ChMeTratio and the center/outer ratio of the ChMeTratio.

**Supplementary Table S1.** Summary of the characteristics of patients with Vogt–Koyanagi–Harada disease enrolled in this study.

| Case | Gender | Age<br>(years) | Time since<br>onset<br>(months) | Classification   |                  | Phase of VKH disease    | Participant in follow-up<br>study? |
|------|--------|----------------|---------------------------------|------------------|------------------|-------------------------|------------------------------------|
|      |        |                |                                 | Right eye        | Left eye         |                         |                                    |
| 1    | Female | 38             | 18                              | Non-sunset       | Non-sunset       | Convalescent phase      | Yes                                |
| 2    | Male   | 41             | 18                              | Non-sunset       | Non-sunset       | Convalescent phase      | Yes                                |
| 3    | Female | 49             | 95                              | Non-sunset       | Non-sunset       | Convalescent phase      |                                    |
| 4    | Female | 56             | 78                              | Non-sunset       | Non-sunset       | Convalescent phase      |                                    |
| 5    | Female | 29             | 32                              | Potential sunset | Non-sunset       | Convalescent phase      |                                    |
| 6    | Female | 43             | 18                              | Non-sunset       | Potential sunset | Convalescent phase      | Yes                                |
| 7    | Female | 25             | 48                              | Potential sunset | Potential sunset | Convalescent phase      |                                    |
| 8    | Female | 37             | 43                              | Potential sunset | Potential sunset | Convalescent phase      |                                    |
| 9    | Male   | 70             | 21                              | Potential sunset | Potential sunset | Convalescent phase      |                                    |
| 10   | Female | 41             | 8                               | Potential sunset | Potential sunset | Convalescent phase      |                                    |
| 11   | Female | 30             | 8                               | Potential sunset | Sunset           | Convalescent phase      |                                    |
| 12   | Female | 54             | 18                              | Sunset           | Potential sunset | Chronic/recurrent phase | Yes                                |
| 13   | Male   | 60             | 18                              | Sunset           | Potential sunset | Convalescent phase      | Yes                                |
| 14   | Female | 49             | 18                              | Sunset           | Sunset           | Chronic/recurrent phase | Yes                                |
| 15   | Male   | 69             | 51                              | Sunset           | Sunset           | Chronic/recurrent phase |                                    |
| 16   | Male   | 65             | 45                              | Sunset           | Sunset           | Convalescent phase      |                                    |
| 17   | Male   | 65             | 69                              | Sunset           | Sunset           | Chronic/recurrent phase |                                    |
| 18   | Male   | 59             | 42                              | Sunset           | Sunset           | Chronic/recurrent phase |                                    |
| 19   | Female | 40             | 12                              | Sunset           | Sunset           | Chronic/recurrent phase |                                    |
| 20   | Male   | 57             | 54                              | Sunset           | Sunset           | Convalescent phase      |                                    |

VKH, Vogt–Koyanagi–Harada.

**Supplementary Table S2.** ChMeT of the whole area, ChMeTratio of the whole area, sunset glow index, and choroidal thickness of the whole area in healthy control, non-sunset, potential sunset, and sunset eyes.

| Parameter                             | Group            | N  | Mean $\pm$ standard deviation (range) |
|---------------------------------------|------------------|----|---------------------------------------|
| ChMeT ( $\mu\text{m}$ )               | Healthy control  | 59 | 30.5 $\pm$ 9.7 (10.8–49.0)            |
|                                       | Non-sunset       | 10 | 23.5 $\pm$ 7.7 (12.6–36.3)            |
|                                       | Potential sunset | 13 | 8.5 $\pm$ 5.3 (0.1–17.5)              |
|                                       | Sunset           | 17 | 3.0 $\pm$ 2.7 (0.2–9.0)               |
| ChMeTratio                            | Healthy control  | 59 | 0.337 $\pm$ 0.097 (0.143–0.592)       |
|                                       | Non-sunset       | 10 | 0.269 $\pm$ 0.140 (0.145–0.521)       |
|                                       | Potential sunset | 13 | 0.077 $\pm$ 0.042 (0.001–0.148)       |
|                                       | Sunset           | 17 | 0.034 $\pm$ 0.027 (0.002–0.099)       |
| Sunset glow index                     | Healthy control  | 59 | 0.562 $\pm$ 0.024 (0.506–0.613)       |
|                                       | Non-sunset       | 10 | 0.563 $\pm$ 0.028 (0.516–0.603)       |
|                                       | Potential sunset | 13 | 0.611 $\pm$ 0.067 (0.488–0.696)       |
|                                       | Sunset           | 17 | 0.642 $\pm$ 0.035 (0.570–0.702)       |
| Choroidal thickness ( $\mu\text{m}$ ) | Healthy control  | 59 | 213.6 $\pm$ 70.8 (87.2–389.1)         |
|                                       | Non-sunset       | 10 | 224.6 $\pm$ 73.5 (89.7–320.1)         |
|                                       | Potential sunset | 13 | 247.6 $\pm$ 89.3 (152.2–431.6)        |
|                                       | Sunset           | 17 | 203.7 $\pm$ 114.2 (81.9–472.6)        |

ChMet, choroidal melanin thickness; ChMeTratio, choroidal melanin thickness ratio.

**Supplementary Table S3.** ChMeT and ChMeTratio at the center area and the outer ring area of healthy control eyes and eyes of patients with Vogt–Koyanagi–Harada disease.

| Parameter               | Group                     | Region      | Mean $\pm$ standard deviation (range) |
|-------------------------|---------------------------|-------------|---------------------------------------|
| ChMeT ( $\mu\text{m}$ ) | Healthy control<br>(N=59) | Center area | 30.5 $\pm$ 10.7 (10.0–58.0)           |
|                         |                           | Outer ring  | 30.6 $\pm$ 10.2 (11.0–52.9)           |
|                         | VKH disease<br>(N=40)     | Center area | 9.9 $\pm$ 8.7 (0.1–34.1)              |
|                         |                           | Outer ring  | 9.9 $\pm$ 10.0 (0.1–38.5)             |
| ChMeTratio              | Healthy control<br>(N=59) | Center area | 0.346 $\pm$ 0.116 (0.135–0.751)       |
|                         |                           | Outer ring  | 0.331 $\pm$ 0.096 (0.133–0.600)       |
|                         | VKH disease<br>(N=40)     | Center area | 0.111 $\pm$ 0.119 (0.001–0.556)       |
|                         |                           | Outer ring  | 0.105 $\pm$ 0.121 (0.001–0.510)       |

ChMeT, choroidal melanin thickness; ChMeTratio, choroidal melanin thickness ratio; VKH, Vogt–Koyanagi–Harada.

**Supplementary Table S4.** Time course of ChMeT, the ChMeTratio, and sunset glow index in 12 eyes of patients with Vogt–Koyanagi–Harada disease.

| Time from onset | ChMeT ( $\mu\text{m}$ ), mean<br>$\pm$ SD (range) | ChMeTratio, mean $\pm$ SD<br>(range) | Sunset glow index, mean $\pm$ SD<br>(range) |
|-----------------|---------------------------------------------------|--------------------------------------|---------------------------------------------|
| 3 months        | 22.1 $\pm$ 11.5 (6.6–44.5)                        | 0.21 $\pm$ 0.17 (0.05–0.54)          | 0.57 $\pm$ 0.02 (0.53–0.59)                 |
| 6 months        | 16.6 $\pm$ 13.3 (3.2–38.9)                        | 0.17 $\pm$ 0.18 (0.03–0.52)          | 0.58 $\pm$ 0.03 (0.55–0.62)                 |
| 9 months        | 13.5 $\pm$ 10.8 (1.5–33.0)                        | 0.15 $\pm$ 0.16 (0.02–0.47)          | 0.60 $\pm$ 0.05 (0.55–0.70)                 |
| 12 months       | 14.6 $\pm$ 10.2 (1.4–30.8)                        | 0.16 $\pm$ 0.15 (0.02–0.48)          | 0.58 $\pm$ 0.03 (0.54–0.64)                 |
| 15 months       | 12.9 $\pm$ 8.9 (0.5–30.5)                         | 0.15 $\pm$ 0.15 (0.01–0.47)          | 0.59 $\pm$ 0.02 (0.56–0.59)                 |
| 18 months       | 12.5 $\pm$ 9.0 (0.8–30.6)                         | 0.16 $\pm$ 0.17 (0.01–0.52)          | 0.62 $\pm$ 0.04 (0.57–0.70)                 |

ChMeT, choroidal melanin thickness; ChMeTratio, choroidal melanin thickness ratio; SD, standard deviation.

**Supplementary Table S5.** Time course of ChMeT, ChMeTratio, and sunset glow index of five non-sunset eyes.

| Time from onset | ChMeT ( $\mu\text{m}$ ), mean $\pm$ SD<br>(range) | ChMeTratio, mean $\pm$ SD (range) | Sunset glow index, mean $\pm$ SD (range) |
|-----------------|---------------------------------------------------|-----------------------------------|------------------------------------------|
| 3 months        | 32.5 $\pm$ 9.5 (6.6–44.5)                         | 0.36 $\pm$ 0.17 (0.16–0.54)       | 0.57 $\pm$ 0.02 (0.55–0.58)              |
| 6 months        | 30.2 $\pm$ 7.9 (22.2–38.9)                        | 0.33 $\pm$ 0.17 (0.15–0.52)       | 0.56 $\pm$ 0.02 (0.55–0.59)              |
| 9 months        | 24.7 $\pm$ 5.9 (18.3–33.0)                        | 0.29 $\pm$ 0.15 (0.15–0.47)       | 0.57 $\pm$ 0.02 (0.55–0.58)              |
| 12 months       | 24.2 $\pm$ 7.4 (14.5–30.8)                        | 0.28 $\pm$ 0.15 (0.10–0.48)       | 0.55 $\pm$ 0.01 (0.54–0.56)              |
| 15 months       | 21.9 $\pm$ 5.0 (19.0–30.5)                        | 0.28 $\pm$ 0.15 (0.13–0.47)       | 0.58 $\pm$ 0.01 (0.56–0.59)              |
| 18 months       | 21.5 $\pm$ 5.7 (14.6–30.6)                        | 0.29 $\pm$ 0.17 (0.15–0.52)       | 0.59 $\pm$ 0.02 (0.57–0.62)              |

ChMet, choroidal melanin thickness; ChMeTratio, choroidal melanin thickness ratio; SD, standard deviation.

**Supplementary Table S6.** Summary of age, ChMeT, ChMeTratio, and choroidal melanin thickness of healthy controls enrolled in this study.

| Subject | Age (years) | ChMeT ( $\mu\text{m}$ ) | ChMeTratio | Choroidal thickness ( $\mu\text{m}$ ) | Sunset glow index |
|---------|-------------|-------------------------|------------|---------------------------------------|-------------------|
| 1       | 56          | 34.8                    | 0.441      | 176.2                                 | 0.539             |
| 2       | 47          | 29.9                    | 0.367      | 191.6                                 | 0.537             |
| 3       | 66          | 44.9                    | 0.348      | 335.9                                 | 0.556             |
| 4       | 68          | 29.7                    | 0.305      | 208.4                                 | 0.553             |
| 5       | 69          | 18.6                    | 0.439      | 92.3                                  | 0.581             |
| 6       | 53          | 29.4                    | 0.319      | 218.6                                 | 0.527             |
| 7       | 61          | 39.1                    | 0.328      | 259.6                                 | 0.577             |
| 8       | 48          | 23.5                    | 0.293      | 180.2                                 | 0.566             |
| 9       | 66          | 25.7                    | 0.385      | 139.6                                 | 0.584             |
| 10      | 56          | 32.6                    | 0.399      | 188.7                                 | 0.571             |
| 11      | 69          | 38.9                    | 0.435      | 219.6                                 | 0.554             |
| 12      | 65          | 43.0                    | 0.564      | 152.3                                 | 0.565             |
| 13      | 69          | 34.4                    | 0.381      | 209.8                                 | 0.132             |
| 14      | 63          | 12.8                    | 0.182      | 176.5                                 | 0.553             |
| 15      | 63          | 39.2                    | 0.508      | 157.8                                 | 0.569             |
| 16      | 54          | 22.4                    | 0.223      | 239.4                                 | 0.567             |
| 17      | 58          | 48.9                    | 0.478      | 241.2                                 | 0.549             |
| 18      | 70          | 25.2                    | 0.592      | 87.2                                  | 0.549             |
| 19      | 57          | 34.6                    | 0.255      | 371.3                                 | 0.571             |
| 20      | 55          | 27.3                    | 0.369      | 139.0                                 | 0.603             |
| 21      | 54          | 49.0                    | 0.423      | 265.8                                 | 0.565             |
| 22      | 67          | 37.4                    | 0.342      | 303.5                                 | 0.544             |
| 23      | 49          | 15.0                    | 0.188      | 205.7                                 | 0.596             |
| 24      | 64          | 32.3                    | 0.256      | 278.7                                 | 0.548             |
| 25      | 60          | 12.8                    | 0.302      | 89.5                                  | 0.612             |
| 26      | 41          | 32.6                    | 0.369      | 191.2                                 | 0.154             |
| 27      | 34          | 41.5                    | 0.334      | 252.5                                 | 0.568             |
| 28      | 26          | 16.8                    | 0.203      | 184.8                                 | 0.506             |
| 29      | 51          | 39.4                    | 0.385      | 231.6                                 | 0.557             |
| 30      | 63          | 42.8                    | 0.292      | 389.1                                 | 0.548             |
| 31      | 42          | 42.9                    | 0.344      | 246.7                                 | 0.579             |



|    |    |      |       |       |       |
|----|----|------|-------|-------|-------|
| 32 | 43 | 30.3 | 0.241 | 340.8 | 0.556 |
| 33 | 37 | 35.1 | 0.357 | 210.0 | 0.532 |
| 34 | 31 | 30.5 | 0.275 | 258.9 | 0.552 |
| 35 | 43 | 37.3 | 0.481 | 156.4 | 0.574 |
| 36 | 36 | 36.4 | 0.317 | 308.2 | 0.543 |
| 37 | 55 | 36.6 | 0.344 | 202.4 | 0.591 |
| 38 | 28 | 48.8 | 0.514 | 206.3 | 0.528 |
| 39 | 39 | 34.5 | 0.362 | 199.4 | 0.569 |
| 40 | 35 | 32.2 | 0.315 | 219.5 | 0.613 |
| 41 | 61 | 23.7 | 0.407 | 127.2 | 0.574 |
| 42 | 33 | 36.6 | 0.350 | 290.5 | 0.562 |
| 43 | 51 | 17.4 | 0.165 | 273.4 | 0.591 |
| 44 | 67 | 32.4 | 0.366 | 209.9 | 0.598 |
| 45 | 23 | 14.0 | 0.238 | 119.5 | 0.555 |
| 46 | 62 | 24.7 | 0.231 | 274.5 | 0.569 |
| 47 | 23 | 34.8 | 0.220 | 369.1 | 0.543 |
| 48 | 70 | 28.8 | 0.450 | 151.3 | 0.567 |
| 49 | 44 | 10.8 | 0.182 | 123.7 | 0.587 |
| 50 | 69 | 35.3 | 0.380 | 233.7 | 0.563 |
| 51 | 65 | 17.7 | 0.234 | 151.9 | 0.590 |
| 52 | 67 | 15.2 | 0.298 | 103.4 | 0.559 |
| 53 | 23 | 30.9 | 0.356 | 197.4 | 0.543 |
| 54 | 29 | 34.1 | 0.329 | 214.1 | 0.518 |
| 55 | 39 | 28.3 | 0.313 | 232.8 | 0.570 |
| 56 | 34 | 14.9 | 0.143 | 241.6 | 0.558 |
| 57 | 23 | 32.2 | 0.269 | 272.5 | 0.511 |
| 58 | 64 | 20.5 | 0.340 | 124.4 | 0.599 |
| 59 | 33 | 29.4 | 0.355 | 167.5 | 0.530 |

---

ChMet, choroidal melanin thickness; ChMeTratio, choroidal melanin thickness ratio.

**Supplementary Table S7.** Summary of ChMeT, ChMeTratio, and choroidal melanin thickness in eyes of patients with Vogt–Koyanagi–Harada disease.

| Case | Eye | ChMeT ( $\mu\text{m}$ ) | ChMeTratio | Choroidal thickness ( $\mu\text{m}$ ) | Sunset glow index |
|------|-----|-------------------------|------------|---------------------------------------|-------------------|
| 1    | R   | 21.5                    | 0.521      | 89.7                                  | 0.565             |
| 1    | L   | 30.6                    | 0.486      | 137.4                                 | 0.566             |
| 2    | R   | 14.6                    | 0.145      | 240.1                                 | 0.591             |
| 2    | L   | 20.5                    | 0.153      | 301.9                                 | 0.603             |
| 3    | R   | 28.3                    | 0.244      | 270.1                                 | 0.568             |
| 3    | L   | 19.2                    | 0.213      | 193.8                                 | 0.572             |
| 4    | R   | 36.3                    | 0.339      | 245.2                                 | 0.516             |
| 4    | L   | 30.7                    | 0.283      | 268.3                                 | 0.521             |
| 5    | R   | 7.3                     | 0.101      | 152.2                                 | 0.532             |
| 5    | L   | 12.6                    | 0.151      | 179.1                                 | 0.548             |
| 6    | R   | 20.5                    | 0.152      | 320.1                                 | 0.622             |
| 6    | L   | 7.6                     | 0.078      | 229.3                                 | 0.625             |
| 7    | R   | 3.8                     | 0.046      | 180.3                                 | 0.613             |
| 7    | L   | 5.3                     | 0.053      | 203.0                                 | 0.661             |
| 8    | R   | 11.5                    | 0.148      | 165.9                                 | 0.488             |
| 8    | L   | 15.1                    | 0.128      | 283.1                                 | 0.503             |
| 9    | R   | 8.5                     | 0.067      | 268.6                                 | 0.696             |
| 9    | L   | 12.9                    | 0.086      | 296.0                                 | 0.673             |
| 10   | R   | 17.5                    | 0.114      | 431.6                                 | 0.643             |
| 10   | L   | 12.5                    | 0.086      | 401.3                                 | 0.645             |
| 11   | R   | 0.1                     | 0.001      | 189.0                                 | 0.696             |
| 11   | L   | 0.2                     | 0.002      | 183.1                                 | 0.694             |
| 12   | R   | 2.1                     | 0.021      | 221.7                                 | 0.608             |
| 12   | L   | 0.8                     | 0.010      | 158.3                                 | 0.613             |
| 13   | R   | 9.0                     | 0.099      | 249.5                                 | 0.590             |
| 13   | L   | 8.0                     | 0.084      | 259.5                                 | 0.600             |
| 14   | R   | 7.5                     | 0.061      | 319.5                                 | 0.702             |
| 14   | L   | 7.6                     | 0.069      | 244.0                                 | 0.696             |
| 15   | R   | 1.5                     | 0.037      | 103.1                                 | 0.627             |
| 15   | L   | 0.8                     | 0.021      | 81.9                                  | 0.670             |
| 16   | R   | 0.8                     | 0.013      | 133.3                                 | 0.631             |
| 16   | L   | 1.6                     | 0.030      | 107.0                                 | 0.639             |

|    |   |     |       |       |       |
|----|---|-----|-------|-------|-------|
| 17 | R | 1.1 | 0.027 | 92.6  | 0.570 |
| 17 | L | 1.3 | 0.029 | 85.9  | 0.633 |
| 18 | R | 2.3 | 0.021 | 204.9 | 0.644 |
| 18 | L | 0.7 | 0.010 | 173.2 | 0.636 |
| 19 | R | 3.6 | 0.016 | 411.7 | 0.586 |
| 19 | L | 3.4 | 0.016 | 472.6 | 0.624 |
| 20 | R | 4.5 | 0.082 | 124.0 | 0.634 |
| 20 | L | 2.6 | 0.027 | 254.6 | 0.640 |

---

ChMet, choroidal melanin thickness; ChMeTratio, choroidal melanin thickness ratio; L, left; R, right.
